# Supplementary material for: Evaluation of MC3T3-E1 Cell Osteogenesis in Different Cell Culture Media
Source: MDPI journal article supplement (doi:10.3390/ijms22147752), 2021-07-20
Supplement: s1 [file s1]

Supplementary Information

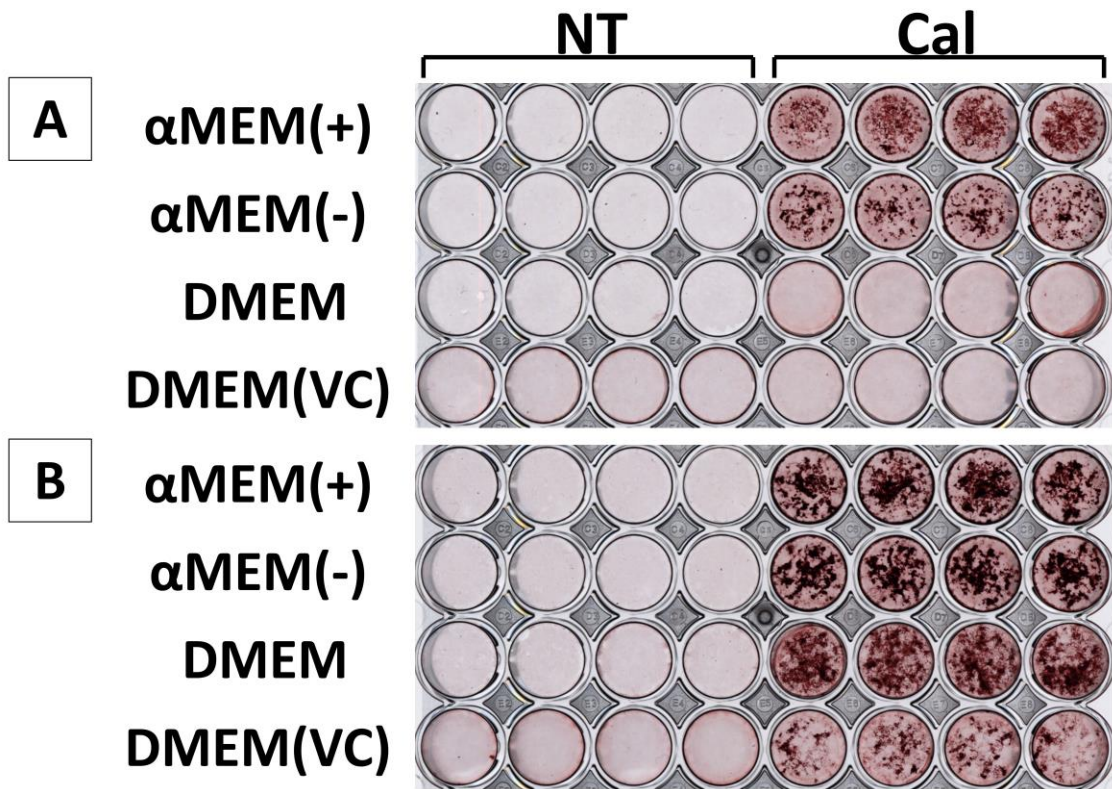

**Figure S1** Effect of calcification on MC3T3-E1 cells after 21 d (A) and 35 d (B). After thawing, MC3T3-E1 cells were passaged twice at  $4.0 \times 10^5$  cells per 10 cm dish every 3 d in  $\alpha$ MEM (+), and cells were seeded at a density of  $6.0 \times 10^4$  cells/mL in a 48-well plate, with four wells of non-treated (NT) and four wells of calcification induction (Cal) per condition. Alizarin Red S (ARS) staining was performed to evaluate calcification after 21 d and 35 d.

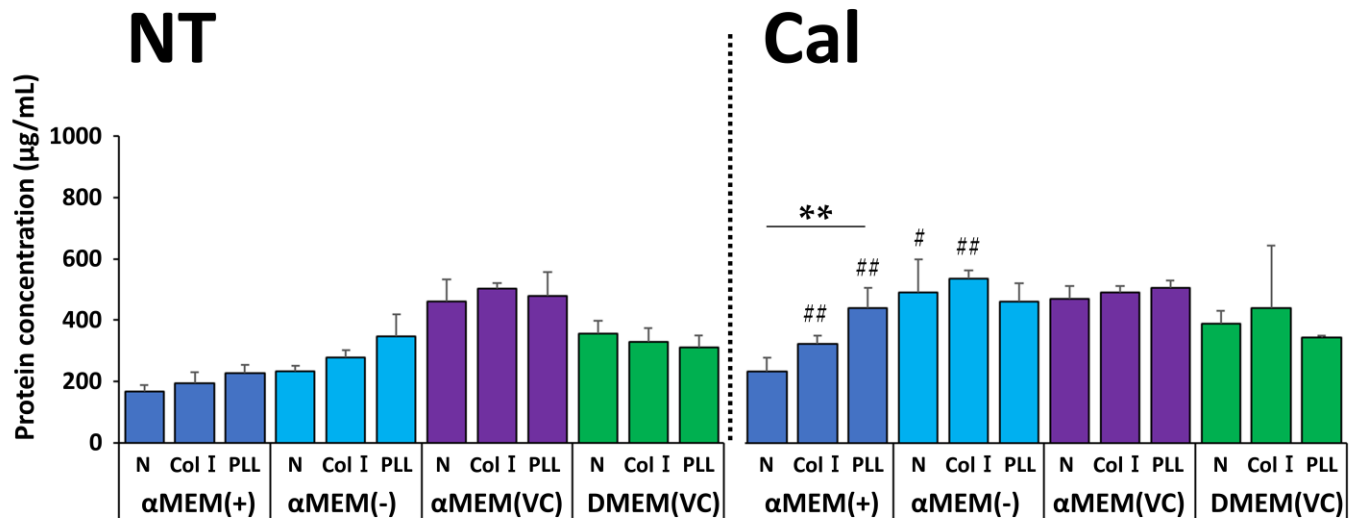

**Figure S2** Comparison of protein concentration at 7 days after calcification induction using MC3T3-E1 cells in normal (N), collagen I-coated (Col I), and poly-L-Lysine-coated (PLL) culture plates ( $n = 3$ , \*\*  $p < 0.01$ , #  $p < 0.05$ , ##  $p < 0.01$ ).

$p < 0.01$ ): \*Comparison among plates under the same media conditions, #Comparison between two groups of the same type of nontreated (NT) and calcification (Cal) media in each plate.
